# Supplementary material for: Sub-Chronic Neuropathological and Biochemical Changes in Mouse Visual System after Repetitive Mild Traumatic Brain Injury
Source: PubMed Central journal article supplement (PMC4835061; doi:10.1371/journal.pone.0153608), 2016-04-18

**S4 Figure. Integration of the identified dysregulated proteins into networks: Network #4 - Behavior, Cell Morphology, Cellular Function and Maintenance.** Six molecules were affected and IPA score was 10. Solid lines indicate direct interaction. Dashed lines indicate indirect interactions. Red molecules were up-regulated and green molecules were down-regulated. White molecules were not user specified, but were incorporated into the network through relationships with other molecules. Of particular note were the network hubs centered on CNN3, QDPR and LAP3.

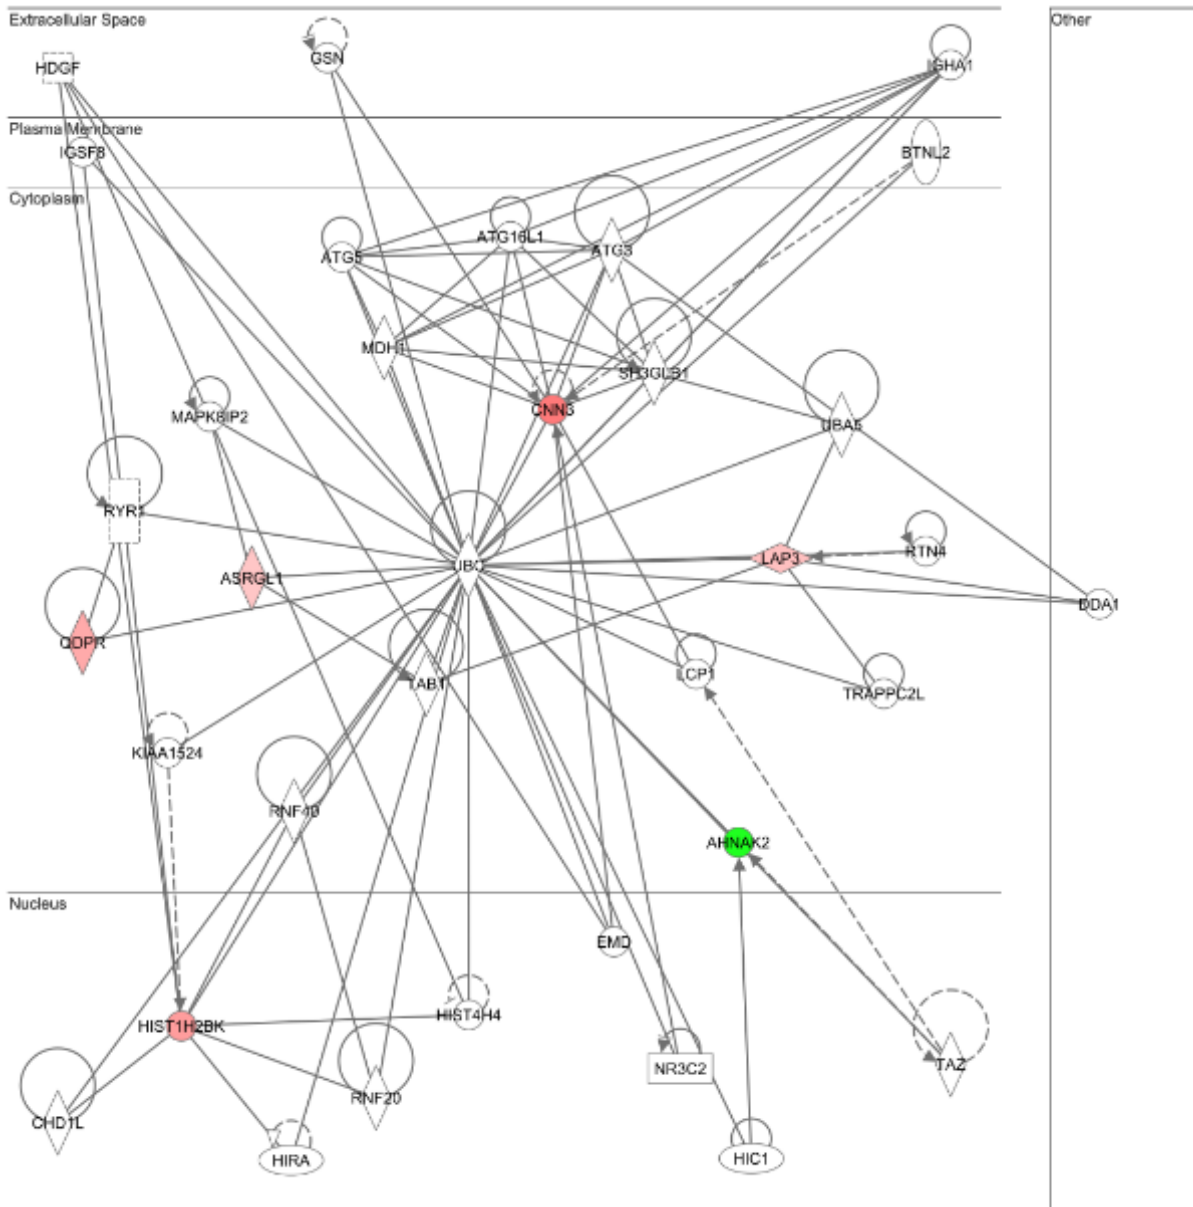

Supplement: pone.0153608.s004.pdf [file pone.0153608.s004.pdf]
