# Supplementary material for: Sub-Chronic Neuropathological and Biochemical Changes in Mouse Visual System after Repetitive Mild Traumatic Brain Injury
Source: PubMed Central journal article supplement (PMC4835061; doi:10.1371/journal.pone.0153608), 2016-04-18
Supplement: pone.0153608.s005.pdf [file pone.0153608.s005.pdf]

**S1 Table. Proteomic data for significantly up- or downregulated proteins at in optic nerve tissue at 3 weeks post injury.** Proteins are listed ranked by the level of dysregulation: the down-regulated proteins sorted from the most downregulated to the least downregulated, while the unregulated sorted from the least upregulated to the most upregulated.

| Accession                     | Description                                                                                               | DF  | Mean    | SD     | t Test  | # AAs | MW [kDa] | Σ# PSMs_10-20%ACN | Σ# PSMs_30-40%ACN | Σ# Unique Peptides_10-20%ACN | Σ# Unique Peptides_30-40%ACN | ΣCoverage_10-20%ACN | ΣCoverage_30-40%ACN | Score SEQUEST_10-20%ACN | Score SEQUEST_30-40%ACN | Score Byonic_10-20%ACN | Score Byonic_30-40%ACN | Σ# Peptides_10-20%ACN | Σ# Peptides_30-40%ACN | Σ# Proteins_10-20%ACN | Σ# Proteins_30-40%ACN |
|-------------------------------|-----------------------------------------------------------------------------------------------------------|-----|---------|--------|---------|-------|----------|-------------------|-------------------|------------------------------|------------------------------|---------------------|---------------------|-------------------------|-------------------------|------------------------|------------------------|-----------------------|-----------------------|-----------------------|-----------------------|
| <b>Downregulated proteins</b> |                                                                                                           |     |         |        |         |       |          |                   |                   |                              |                              |                     |                     |                         |                         |                        |                        |                       |                       |                       |                       |
| E9PYB0                        | Protein Ahnak2 (Fragment) OS=Mus musculus GN=Ahnak2 PE=2 SV=1 - [E9PYB0_MOUSE]                            | 11  | -0.6257 | 0.3176 | 0.00003 | 1739  | 182.6    | 2                 | 5                 | 2                            | 3                            | 5.23                | 8.11                | 5.5                     | 4.59                    | 10.27                  | 2                      | 3                     | 1                     | 3                     |                       |
| P08551                        | Neurofilament light polypeptide OS=Mus musculus GN=Nefl PE=1 SV=5 - [NFL_MOUSE]                           | 68  | -0.5059 | 0.3206 | 0.00000 | 543   | 61.5     | 40                | 19                | 17                           | 6                            | 30.94               | 11.23               | 75.59                   | 26.34                   | 91.81                  | 31.98                  | 20                    | 7                     | 1                     | 1                     |
| P68368                        | Tubulin alpha-4A chain OS=Mus musculus GN=Tuba4a PE=1 SV=1 - [TBA4A_MOUSE]                                | 11  | -0.4962 | 0.3034 | 0.00015 | 448   | 49.9     | 14                | 21                | 2                            | 2                            | 17.86               | 21.65               | 37.38                   | 56.57                   | 15.15                  | 8.92                   | 8                     | 8                     | 2                     | 2                     |
| P14873                        | Microtubule-associated protein 1B OS=Mus musculus GN=Map1b PE=1 SV=2 - [MAP1B_MOUSE]                      | 32  | -0.4362 | 0.2979 | 0.00000 | 2464  | 270.1    | 8                 | 15                | 5                            | 7                            | 1.79                | 3.25                | 6.51                    | 16.79                   | 20.42                  | 30.62                  | 5                     | 8                     | 1                     | 1                     |
| P08553                        | Neurofilament medium polypeptide OS=Mus musculus GN=Nefm PE=1 SV=4 - [NFM_MOUSE]                          | 86  | -0.4262 | 0.3369 | 0.00000 | 848   | 95.9     | 65                | 31                | 26                           | 12                           | 30.78               | 14.98               | 95.46                   | 38.54                   | 170.37                 | 63.15                  | 29                    | 13                    | 2                     | 2                     |
| Q9Z0F7                        | Gamma-synuclein OS=Mus musculus GN=Sncg PE=1 SV=1 - [SYUG_MOUSE]                                          | 8   | -0.4165 | 0.1846 | 0.00014 | 123   | 13.2     | 6                 |                   | 3                            |                              | 21.95               |                     | 9.28                    |                         | 12.05                  |                        | 3                     |                       | 2                     |                       |
| Q9WTK5-2                      | Isoform 2 of A-kinase anchor protein 12 OS=Mus musculus GN=Akap12 - [AKA12_MOUSE]                         | 5   | -0.3996 | 0.1828 | 0.00305 | 1579  | 169.6    |                   | 3                 | 2                            |                              | 0.95                |                     | 2.46                    |                         | 5.53                   |                        | 2                     |                       | 2                     |                       |
| P46660                        | Alpha-interneuron OS=Mus musculus GN=Ina PE=1 SV=3 - [AINX_MOUSE]                                         | 53  | -0.3989 | 0.3141 | 0.00000 | 501   | 55.3     | 31                | 21                | 13                           | 8                            | 30.74               | 17.17               | 61.94                   | 23.07                   | 80.43                  | 39.79                  | 16                    | 9                     | 1                     | 1                     |
| P19246                        | Neurofilament heavy polypeptide OS=Mus musculus GN=Nefh PE=1 SV=3 - [NFH_MOUSE]                           | 76  | -0.3301 | 0.5159 | 0.00000 | 1090  | 116.9    | 38                | 12                | 19                           | 7                            | 28.17               | 5.87                | 59.49                   | 12.65                   | 107.26                 | 22.02                  | 20                    | 7                     | 1                     | 1                     |
| Q08331                        | Calretinin OS=Mus musculus GN=Calb2 PE=1 SV=3 - [CALB2_MOUSE]                                             | 35  | -0.3053 | 0.3202 | 0.00000 | 271   | 31.4     | 15                | 18                | 6                            | 5                            | 21.77               | 16.97               | 18.83                   | 21.78                   | 44.34                  | 39.14                  | 6                     | 5                     | 1                     | 2                     |
| P15331-3                      | Isoform 5b of Peripherin OS=Mus musculus GN=Pph - [PERI_MOUSE]                                            | 5   | -0.2747 | 0.1107 | 0.00174 | 461   | 52.7     | 7                 | 3                 | 1                            | 1                            | 8.24                | 4.56                | 19.05                   | 4.28                    | 1.77                   | 1.83                   | 5                     | 2                     | 7                     | 6                     |
| P16330                        | 2',3'-cyclic-nucleotide 3'-phosphodiesterase OS=Mus musculus GN=Cnp PE=1 SV=3 - [CN37_MOUSE]              | 92  | -0.2681 | 0.3807 | 0.00000 | 420   | 47.1     | 40                | 49                | 15                           | 21                           | 26.19               | 35.95               | 55.29                   | 54.98                   | 102.73                 | 89.68                  | 15                    | 22                    | 2                     | 17                    |
| Q9EQF6                        | Dihydropyrimidinase-related protein 5 OS=Mus musculus GN=Dpysl5 PE=1 SV=1 - [DPYL5_MOUSE]                 | 20  | -0.2602 | 0.3036 | 0.00083 | 564   | 61.5     | 3                 | 14                | 2                            | 5                            | 2.48                | 7.62                | 2.43                    | 13.32                   | 3.68                   | 22.55                  | 2                     | 5                     | 2                     | 2                     |
| Q6PIC6                        | Sodium/potassium-transporting ATPase subunit alpha-3 OS=Mus musculus GN=Atp1a3 PE=1 SV=1 - [ATP1A3_MOUSE] | 35  | -0.2592 | 0.3009 | 0.00001 | 1013  | 111.6    | 35                | 53                | 8                            | 6                            | 15.5                | 16.98               | 63.32                   | 70.39                   | 102.79                 | 115.55                 | 14                    | 16                    | 5                     | 7                     |
| P20917-2                      | Isoform S-MAG of Myelin-associated glycoprotein OS=Mus musculus GN=Mag - [MAG_MOUSE]                      | 14  | -0.2553 | 0.2819 | 0.00348 | 582   | 64.2     | 6                 |                   | 5                            |                              | 6.19                |                     | 4.13                    |                         | 19.68                  |                        | 5                     |                       | 2                     |                       |
| J3QQ16                        | Protein Col6a3 OS=Mus musculus GN=Col6a3 PE=2 SV=1 - [J3QQ16_MOUSE]                                       | 38  | -0.2510 | 0.3209 | 0.00002 | 2677  | 288.5    |                   | 28                | 15                           |                              | 5.01                |                     | 30.61                   |                         | 53.37                  |                        | 15                    |                       | 3                     |                       |
| Q9WV92-7                      | Isoform 7 of Band 4.1-like protein 3 OS=Mus musculus GN=Epb41i3 - [E41L3_MOUSE]                           | 20  | -0.2373 | 0.2095 | 0.00004 | 823   | 91.8     | 3                 | 17                | 2                            | 5                            | 2.07                | 9.36                | 2.41                    | 13.51                   | 9.02                   | 23.83                  | 2                     | 8                     | 8                     | 16                    |
| Q04857                        | Collagen alpha-1(VI) chain OS=Mus musculus GN=Col6a1 PE=2 SV=1 - [CO6A1_MOUSE]                            | 35  | -0.2275 | 0.2767 | 0.00002 | 1025  | 108.4    | 11                | 13                | 7                            | 7                            | 5.76                | 6.63                | 10.34                   | 18.33                   | 23.94                  | 38.94                  | 7                     | 7                     | 1                     | 1                     |
| A2ARP8                        | Microtubule-associated protein 1A OS=Mus musculus GN=Map1a PE=2 SV=1 - [A2ARP8_MOUSE]                     | 42  | -0.2249 | 0.2810 | 0.00000 | 3014  | 325.7    | 12                | 25                | 7                            | 10                           | 2.29                | 3.45                | 14.54                   | 24.63                   | 38.09                  | 43.29                  | 7                     | 11                    | 3                     | 3                     |
| P97427                        | Dihydropyrimidinase-related protein 1 OS=Mus musculus GN=Cmp1 PE=1 SV=1 - [DPYL1_MOUSE]                   | 14  | -0.2232 | 0.2287 | 0.00203 | 572   | 62.1     | 4                 | 8                 | 2                            | 3                            | 5.59                | 6.82                | 8.2                     | 17                      | 6.59                   | 13.83                  | 3                     | 4                     | 2                     | 2                     |
| E9PWQ3                        | Protein Col6a3 OS=Mus musculus GN=Col6a3 PE=2 SV=2 - [E9PWQ3_MOUSE]                                       | 29  | -0.2100 | 0.2888 | 0.00042 | 3284  | 353.7    | 14                |                   | 10                           |                              | 2.8                 |                     | 11.56                   |                         | 37.84                  |                        | 10                    |                       | 3                     |                       |
| Q8K0U4                        | Heat shock 70 kDa protein 12A OS=Mus musculus GN=Hspa12a PE=1 SV=1 - [HS12A_MOUSE]                        | 35  | -0.1973 | 0.2608 | 0.00006 | 675   | 74.8     | 9                 | 19                | 5                            | 10                           | 7.7                 | 15.26               | 11.59                   | 26.55                   | 26.19                  | 41.51                  | 5                     | 10                    | 1                     | 2                     |
| Q7TMM9                        | Tubulin beta-2A chain OS=Mus musculus GN=Tubb2a PE=1 SV=1 - [TBB2A_MOUSE]                                 | 23  | -0.1911 | 0.2878 | 0.00351 | 445   | 49.9     | 14                | 34                | 1                            | 3                            | 22.7                | 25.39               | 50.27                   | 68.58                   | 3.7                    | 39.99                  | 8                     | 10                    | 3                     | 3                     |
| P04370-9                      | Isoform 9 of Myelin basic protein OS=Mus musculus GN=Mbp - [MBP_MOUSE]                                    | 44  | -0.1488 | 0.3139 | 0.00270 | 184   | 20.2     | 77                |                   | 13                           |                              | 57.61               |                     | 106.91                  |                         | 97.49                  |                        | 13                    |                       | 18                    |                       |
| A3KGU5                        | Spectrin alpha chain, non-erythrocytic 1 OS=Mus musculus GN=Sptan1 PE=2 SV=1 - [A3KGU5_MOUSE]             | 102 | -0.1402 | 0.3107 | 0.00001 | 2457  | 282.7    |                   | 70                | 33                           |                              | 11.44               |                     | 86.69                   |                         | 147.97                 |                        | 33                    |                       | 6                     |                       |
| Q62261                        | Spectrin beta chain, non-erythrocytic 1 OS=Mus musculus GN=Sptbn1 PE=1 SV=2 - [SPTB2_MOUSE]               | 95  | -0.1092 | 0.2165 | 0.00000 | 2363  | 274.1    | 35                | 32                | 20                           | 15                           | 7.66                | 6.26                | 45.79                   | 43                      | 109.31                 | 82.95                  | 20                    | 15                    | 3                     | 7                     |
| Q08553                        | Dihydropyrimidinase-related protein 2 OS=Mus musculus GN=Dpysl2 PE=1 SV=2 - [DPYL2_MOUSE]                 | 56  | -0.1069 | 0.2480 | 0.00192 | 572   | 62.2     | 30                | 35                | 13                           | 9                            | 32.52               | 21.85               | 52.53                   | 47.31                   | 109.2                  | 76.91                  | 14                    | 11                    | 1                     | 1                     |
| P16546                        | Spectrin alpha chain, non-erythrocytic 1 OS=Mus musculus GN=Sptan1 PE=1 SV=4 - [SPTN1_MOUSE]              | 79  | -0.0955 | 0.2183 | 0.00019 | 2472  | 284.4    | 47                |                   | 26                           |                              | 9.95                |                     | 57.92                   |                         | 136.38                 |                        | 26                    |                       | 7                     |                       |
| <b>Upregulated proteins</b>   |                                                                                                           |     |         |        |         |       |          |                   |                   |                              |                              |                     |                     |                         |                         |                        |                        |                       |                       |                       |                       |
| P08113                        | Endoplasmic reticulum chaperone protein OS=Mus musculus GN=Hsp90b1 PE=1 SV=2 - [ENPL_MOUSE]               | 32  | 0.0816  | 0.1453 | 0.00289 | 802   | 92.4     | 8                 | 10                | 5                            | 6                            | 5.74                | 5.86                | 9.39                    | 10.49                   | 23.02                  | 19.2                   | 5                     | 6                     | 2                     | 2                     |
| P20152                        | Vimentin OS=Mus musculus GN=Vim PE=1 SV=3 - [VIME_MOUSE]                                                  | 110 | 0.0905  | 0.2437 | 0.00016 | 466   | 53.7     | 101               | 48                | 25                           | 14                           | 56.65               | 30.04               | 156.83                  | 50.52                   | 276.37                 | 87.97                  | 32                    | 16                    | 5                     | 22                    |
| P35700                        | Peroxiredoxin-1 OS=Mus musculus GN=Prdx1 PE=1 SV=1 - [PRDX1_MOUSE]                                        | 35  | 0.1064  | 0.1799 | 0.00113 | 199   | 22.2     | 18                | 28                | 7                            | 9                            | 32.16               | 45.23               | 26.35                   | 40.94                   | 47.65                  | 54.75                  | 7                     | 9                     | 6                     | 6                     |
| P10126                        | Elongation factor 1-alpha 1 OS=Mus musculus GN=Eef1a1 PE=1 SV=3 - [EF1A1_MOUSE]                           | 26  | 0.1269  | 0.2153 | 0.00504 | 462   | 50.1     | 8                 | 17                | 5                            | 7                            | 8.66                | 12.99               | 7.54                    | 19.87                   | 19.21                  | 31.56                  | 5                     | 7                     | 4                     | 4                     |
| P62754                        | 40S ribosomal protein S6 OS=Mus musculus GN=Rps6 PE=1 SV=1 - [RS6_MOUSE]                                  | 8   | 0.1335  | 0.1046 | 0.00503 | 249   | 28.7     | 4                 | 1                 | 2                            | 1                            | 8.03                | 2.01                | 5.36                    | 10.31                   | 2.83                   | 2.83                   | 2                     | 1                     | 1                     | 1                     |
| E9Q616                        | Protein Ahnak OS=Mus musculus GN=Ahnak PE=2 SV=1 - [E9Q616_MOUSE]                                         | 38  | 0.1538  | 0.1746 | 0.00000 | 5656  | 603.9    | 7                 | 17                | 1                            | 10                           | 2.86                | 5.94                | 6.25                    | 11.35                   | 11.98                  | 34.01                  | 2                     | 10                    | 1                     | 1                     |
| P07356                        | Annexin A2 OS=Mus musculus GN=Anxa2 PE=1 SV=2 - [ANXA2_MOUSE]                                             | 31  | 0.1547  | 0.2146 | 0.00030 | 339   | 38.7     | 12                | 6                 | 7                            | 4                            | 20.65               | 10.62               | 19.35                   | 5.75                    | 40.2                   | 15.27                  | 7                     | 4                     | 4                     | 4                     |
| B7FAV1                        | Filamin, alpha (Fragment) OS=Mus musculus GN=Flna PE=4 SV=1 - [B7FAV1_MOUSE]                              | 5   | 0.1672  | 0.0832 | 0.00438 | 2583  | 274.5    | 4                 |                   | 2                            |                              | 0.85                |                     | 5.37                    |                         | 5.91                   |                        | 3                     |                       | 4                     |                       |
| Q8COM9                        | Isoaspartyl peptidase/L-asparaginase OS=Mus musculus GN=Asrgl1 PE=1 SV=1 - [ASGL1_MOUSE]                  | 17  | 0.1698  | 0.1895 | 0.00143 | 326   | 33.9     | 5                 | 6                 | 3                            | 3                            | 7.98                | 10.74               | 4.42                    | 9.07                    | 8.92                   | 14.58                  | 3                     | 3                     | 1                     | 1                     |
| Q9CPY7-2                      | Isoform 2 of Cytosol aminopeptidase OS=Mus musculus GN=Lap3 - [AMPL_MOUSE]                                | 14  | 0.1873  | 0.1880 | 0.00173 | 488   | 52.7     | 3                 | 6                 | 2                            | 3                            | 3.28                | 6.35                | 1.64                    | 8.87                    | 3.81                   | 16.41                  | 2                     | 3                     | 2                     | 2                     |
| P60710                        | Actin, cytoplasmic 1 OS=Mus musculus GN=Actb PE=1 SV=1 - [ACTB_MOUSE]                                     | 53  | 0.1941  | 0.2052 | 0.00000 | 375   | 41.7     | 38                | 47                | 5                            | 9                            | 34.93               | 24.27               | 71.16                   | 58.47                   | 120.1                  | 78.33                  | 10                    | 10                    | 11                    | 18                    |
| P01029                        | Complement C4-B OS=Mus musculus GN=C4b PE=1 SV=3 - [C04B_MOUSE]                                           | 11  | 0.2085  | 0.1237 | 0.00011 | 1738  | 192.8    | 2                 | 6                 | 1                            | 3                            | 0.4                 | 1.5                 | 1.91                    | 8.25                    | 1.86                   | 10.07                  | 1                     | 3                     | 1                     | 1                     |
| P62908                        | 40S ribosomal protein S3 OS=Mus musculus GN=Rps3 PE=1 SV=1 - [RS3_MOUSE]                                  | 14  | 0.2164  | 0.2317 | 0.00280 | 243   | 26.7     | 9                 |                   | 5                            |                              | 18.11               |                     | 12.67                   |                         | 17.64                  |                        | 5                     |                       | 2                     |                       |
| Q80SW1                        | Putative adenosylhomocysteinase 2 OS=Mus musculus GN=Ahcy1 PE=1 SV=1 - [SAHH2_MOUSE]                      | 5   | 0.2340  | 0.1100 | 0.00343 | 530   | 58.9     | 4                 |                   | 2                            |                              | 4.72                |                     | 4.96                    |                         | 7.5                    |                        | 3                     |                       | 1                     |                       |
| P24369                        | Peptidyl-prolyl cis-trans isomerase B OS=Mus musculus GN=Ppib PE=2 SV=2 - [PPIB_MOUSE]                    | 8   | 0.2341  | 0.1351 | 0.00082 | 216   | 23.7     | 3                 | 1                 | 2                            | 1                            | 6.02                | 3.24                | 1.81                    | 1.94                    | 5.65                   |                        | 2                     | 1                     | 1                     | 1                     |
| Q8VHX6-2                      | Isoform 2 of Filamin-C OS=Mus musculus GN=Flnc - [FLNC_MOUSE]                                             | 41  | 0.2544  | 0.2231 | 0.00000 | 2693  | 287.2    | 5                 | 25                | 2                            | 11                           | 1.15                | 4.75                | 8.24                    | 31.73                   | 12.3                   | 56.09                  | 3                     | 12                    | 4                     | 5                     |
| Q8BV14                        | Dihydropteridine reductase OS=Mus musculus GN=Qdpr PE=1 SV=2 - [DHPR_MOUSE]                               | 17  | 0.2566  | 0.1883 | 0.00002 | 241   | 25.6     | 4                 | 10                | 2                            | 5                            | 6.22                | 22.82               | 3.84                    | 13.73                   | 8.05                   | 27.92                  | 2                     | 5                     | 4                     | 3                     |
| P15105                        | Glutamine synthetase OS=Mus musculus GN=Glul PE=1 SV=6 - [GLNA_MOUSE]                                     | 23  | 0.2759  | 0.1317 | 0.00000 | 373   | 42.1     | 8                 | 8                 | 5                            | 4                            | 12.33               | 11.8                | 11.54                   | 9.54                    | 25.67                  | 15.36                  | 5                     | 4                     | 2                     | 3                     |
| P26041                        | Moesin OS=Mus musculus GN=Msn PE=1 SV=3 - [MOES_MOUSE]                                                    | 17  | 0.2759  | 0.2076 | 0.00003 | 577   | 67.7     | 13                | 6                 | 4                            | 2                            | 10.57               | 5.55                | 17.08                   | 0                       | 32.11                  | 10.54                  | 7                     | 4                     | 3                     | 3                     |
| D3YZ06                        | Heat shock protein beta-1 OS=Mus musculus GN=Hspb1 PE=2 SV=1 - [D3YZ06_MOUSE]                             | 5   | 0.2870  | 0.0509 | 0.00004 | 147   | 16.8     |                   | 4                 |                              | 2                            | 17.69               |                     | 7.52                    |                         | 13.22                  |                        | 2                     |                       |                       | 4                     |
| Q8CGP1                        | Histone H2B type 1-K OS=Mus musculus GN=H2b1k PE=1 SV=3 - [H2B1K_MOUSE]                                   | 17  | 0.2932  | 0.1830 | 0.00000 | 126   | 13.9     | 12                |                   | 6                            |                              | 37.3                |                     | 13.37                   |                         | 31.24                  |                        | 6                     |                       | 15                    |                       |
| O88958                        | Glucosamine-6-phosphate isomerase 1 OS=Mus musculus GN=Gnpda1 PE=2 SV=3 - [GNPI1_MOUSE]                   | 5   | 0.3240  | 0.1466 | 0.00291 | 289   | 32.5     |                   | 3                 |                              | 2                            |                     | 5.19                |                         | 2.78                    |                        | 6.07                   |                       | 2                     |                       | 1                     |
| P08226                        | Apolipoprotein E OS=Mus musculus GN=ApoE PE=1 SV=2 - [APOE_MOUSE]                                         | 14  | 0.3418  | 0.3220 | 0.00106 | 311   | 35.8     | 9                 | 2                 | 5                            | 1                            | 17.36               | 2.89                | 11.12                   | 3.11                    | 21                     |                        |                       |                       |                       |                       |
