# Supplementary material for: Sub-Chronic Neuropathological and Biochemical Changes in Mouse Visual System after Repetitive Mild Traumatic Brain Injury
Source: PubMed Central journal article supplement (PMC4835061; doi:10.1371/journal.pone.0153608), 2016-04-18
Supplement: pone.0153608.s006.pdf [file pone.0153608.s006.pdf]

**S2 Table. Canonical pathways associated with the effects of r-mTBI on optic nerve tissue at 3 weeks post injury.** The list shows pathways that were significantly upregulated with log(p-value) >1.3 (equivalent to a p-value of <0.05). The ratio value represents the number of molecules affected in the current data set for the particular pathway compared to the total number of molecules in that pathway according to the IPA analysis.

| #  | Ingenuity Canonical Pathways                 | -log(p-value) | Ratio    | # molecules | Molecules                        |
|----|----------------------------------------------|---------------|----------|-------------|----------------------------------|
| 1  | Caveolar-mediated Endocytosis Signaling      | 4.33E00       | 5.56E-02 | 4           | ALB,FLNA,FLNC,ACTB               |
| 2  | Sertoli Cell-Sertoli Cell Junction Signaling | 3.87E00       | 2.79E-02 | 5           | SPTBN1,ACTB,TUBB2A,TUBA4A,SPTAN1 |
| 3  | Amyotrophic Lateral Sclerosis Signaling      | 3.81E00       | 4.08E-02 | 4           | PRPH,NEFL,NEFH,GLUL              |
| 4  | Semaphorin Signaling in Neurons              | 3.37E00       | 5.66E-02 | 3           | DPYSL2,CRMP1,DPYSL5              |
| 5  | Remodeling of Epithelial Adherens Junctions  | 3.05E00       | 4.41E-02 | 3           | ACTB,TUBB2A,TUBA4A               |
| 6  | ILK Signaling                                | 2.76E00       | 2.15E-02 | 4           | FLNA,FLNC,ACTB,VIM               |
| 7  | Virus Entry via Endocytic Pathways           | 2.72E00       | 3.37E-02 | 3           | FLNA,FLNC,ACTB                   |
| 8  | Death Receptor Signaling                     | 2.68E00       | 3.26E-02 | 3           | ACTB,SPTAN1,HSPB1                |
| 9  | Glutamine Biosynthesis I                     | 2.56E00       | 1E00     | 1           | GLUL                             |
| 10 | 14-3-3-mediated Signaling                    | 2.38E00       | 2.56E-02 | 3           | TUBB2A,TUBA4A,VIM                |
| 11 | LXR/RXR Activation                           | 2.34E00       | 2.48E-02 | 3           | C4A/C4B,APOE,ALB                 |
| 12 | FXR/RXR Activation                           | 2.28E00       | 2.36E-02 | 3           | C4A/C4B,APOE,ALB                 |
| 13 | Asparagine Degradation I                     | 2.26E00       | 5E-01    | 1           | ASRGL1                           |
| 14 | Axonal Guidance Signaling                    | 2.17E00       | 1.16E-02 | 5           | DPYSL2,MAG,TUBB2A,TUBA4A,DPYSL5  |
| 15 | Aryl Hydrocarbon Receptor Signaling          | 2.16E00       | 2.14E-02 | 3           | CTSD,HSP90B1,HSPB1               |
| 16 | Epithelial Adherens Junction Signaling       | 2.11E00       | 2.05E-02 | 3           | ACTB,TUBB2A,TUBA4A               |
| 17 | Thyroid Hormone Biosynthesis                 | 2.08E00       | 3.33E-01 | 1           | CTSD                             |
| 18 | N-acetylglucosamine Degradation I            | 2.08E00       | 3.33E-01 | 1           | GNPDA1                           |
| 19 | Aldosterone Signaling in Epithelial Cells    | 2.07E00       | 1.97E-02 | 3           | HSP90B1,HSPA12A,HSPB1            |
| 20 | Gap Junction Signaling                       | 2.04E00       | 1.94E-02 | 3           | ACTB,TUBB2A,TUBA4A               |
| 21 | Germ Cell-Sertoli Cell Junction Signaling    | 2.01E00       | 1.88E-02 | 3           | ACTB,TUBB2A,TUBA4A               |
| 22 | Uracil Degradation II (Reductive)            | 1.96E00       | 2.5E-01  | 1           | DPYSL2                           |
| 23 | Thymine Degradation                          | 1.96E00       | 2.5E-01  | 1           | DPYSL2                           |
| 24 | N-acetylglucosamine Degradation II           | 1.96E00       | 2.5E-01  | 1           | GNPDA1                           |
| 25 | Phenylalanine Degradation I (Aerobic)        | 1.96E00       | 2.5E-01  | 1           | QDPR                             |
| 26 | NRF2-mediated Oxidative Stress Response      | 1.87E00       | 1.67E-02 | 3           | PIIB,PRDX1,ACTB                  |
| 27 | Clathrin-mediated Endocytosis Signaling      | 1.84E00       | 1.62E-02 | 3           | APOE,ALB,ACTB                    |
| 28 | Actin Cytoskeleton Signaling                 | 1.65E00       | 1.38E-02 | 3           | FLNA,ACTB,MSN                    |
| 29 | UDP-N-acetyl-D-galactosamine Biosynthesis II | 1.61E00       | 1.11E-01 | 1           | GNPDA1                           |
| 30 | Neuregulin Signaling                         | 1.61E00       | 2.27E-02 | 2           | RPS6,HSP90B1                     |
| 31 | Signaling by Rho Family GTPases              | 1.57E00       | 1.28E-02 | 3           | ACTB,VIM,MSN                     |
| 32 | Protein Ubiquitination Pathway               | 1.48E00       | 1.18E-02 | 3           | HSP90B1,HSPA12A,HSPB1            |
| 33 | Methionine Degradation I (to Homocysteine)   | 1.36E00       | 6.25E-02 | 1           | AHCYL1                           |
| 34 | RhoA Signaling                               | 1.35E00       | 1.64E-02 | 1           | ACTB,MSN                         |
| 35 | Atherosclerosis Signaling                    | 1.34E00       | 1.63E-02 | 1           | APOE,ALB                         |
| 36 | Cysteine Biosynthesis III (mammalia)         | 1.31E00       | 5.56E-02 | 1           | AHCYL1                           |
