# Supplementary material for: Sub-Chronic Neuropathological and Biochemical Changes in Mouse Visual System after Repetitive Mild Traumatic Brain Injury
Source: PubMed Central journal article supplement (PMC4835061; doi:10.1371/journal.pone.0153608), 2016-04-18
Supplement: pone.0153608.s007.pdf [file pone.0153608.s007.pdf]

**S3 Table. MS/MS product ion identification of fatty acid composition and position for major molecular species detected.** The relative abundance of two fatty acids is shown in the cells highlighted in green.

| Precursor | Head Grp | Species | SN1    | SN2  | %  |
|-----------|----------|---------|--------|------|----|
| 750.6     | PC       | 30:0    | 16:0   | 14:0 |    |
| 778.6     | PC       | 32:0    | 16:0   | 16:0 |    |
| 778.6     | PC       | 32:0    | 16:0   | 16:0 |    |
| 776.6     | PC       | 32:1    | 16:0   | 16:1 |    |
| 804.6     | PC       | 34:1    | 16:0   | 18:1 |    |
| 804.6     | PC       | 34:1    | 16:0   | 18:1 |    |
| 832.6     | PC       | 36:1    | 18:0   | 18:1 |    |
| 832.6     | PC       | 36:1    | 18:0   | 18:1 |    |
| 830.6     | PC       | 36:2    | 18:1   | 18:1 |    |
| 830.6     | PC       | 36:2    | 18:1   | 18:1 |    |
| 826.6     | PC       | 36:4    | 16:0   | 20:4 |    |
| 860.7     | PC       | 38:1    | 18:0   | 20:1 |    |
| 858.7     | PC       | 38:2    | 18:1   | 20:1 |    |
| 854.7     | PC       | 38:4    | 18:0   | 20:4 |    |
| 854.7     | PC       | 38:4    | 18:0   | 20:4 |    |
| 888.7     | PC       | 40:1    | 22:0   | 18:1 |    |
| 882.7     | PC       | 40:4    | 18:0   | 22:4 |    |
| 878.7     | PC       | 40:6    | 18:0   | 22:6 |    |
| 916.7     | PC       | 42:1    | 24:0   | 18:1 |    |
| 790.6     | PC       | o-34:1  | o-16:0 | 18:1 | 50 |
| 790.6     | PC       | o-34:1  | o-18:1 | 16:0 | 50 |
| 818.6     | PC       | o-36:1  | o-18:0 | 18:0 |    |
| 744.6     | PE       | 36:1    | 18:0   | 18:1 |    |
| 744.6     | PE       | 36:1    | 18:0   | 18:1 |    |
| 728.6     | PE       | 36:2    | 18:1   | 20:1 |    |
| 766.6     | PE       | 38:4    | 18:0   | 20:4 |    |
| 790.6     | PE       | 40:6    | 18:0   | 22:6 |    |
| 790.6     | PE       | 40:6    | 18:0   | 22:6 |    |
| 700.6     | PE       | o-34:2  | o-16:1 | 18:1 | 80 |
| 700.6     | PE       | o-34:2  | o-18:2 | 16:0 | 20 |
| 700.6     | PE       | o-34:2  | o-16:1 | 18:1 | 70 |
| 700.6     | PE       | o-34:2  | o-18:2 | 16:0 | 30 |
| 728.6     | PE       | o-36:2  | o-16:1 | 20:1 | 30 |
| 728.6     | PE       | o-36:2  | o-18:1 | 18:1 | 70 |
| 726.6     | PE       | o-36:3  | o-18:2 | 18:1 |    |
| 756.6     | PE       | o-38:2  | o-18:1 | 20:1 | 85 |
| 756.6     | PE       | o-38:2  | o-18:2 | 20:0 | 15 |
| 750.6     | PE       | o-38:5  | o-16:1 | 22:4 | 30 |
| 750.6     | PE       | o-38:5  | o-18:1 | 22:5 | 70 |
| 750.6     | PE       | o-38:5  | o-16:1 | 22:6 | 40 |
| 750.6     | PE       | o-38:5  | o-18:1 | 22:7 | 60 |
| 778.6     | PE       | o-40:5  | o-18:1 | 22:4 |    |
| 774.6     | PE       | o-40:7  | o-18:1 | 22:6 |    |
| 747.6     | PG       | 34:1    | 16:0   | 18:1 |    |
| 885.7     | PI       | 38:4    | 18:0   | 20:4 |    |
