# Supplementary material for: Sub-Chronic Neuropathological and Biochemical Changes in Mouse Visual System after Repetitive Mild Traumatic Brain Injury
Source: PubMed Central journal article supplement (PMC4835061; doi:10.1371/journal.pone.0153608), 2016-04-18
Supplement: pone.0153608.s008.pdf [file pone.0153608.s008.pdf]

**S4 Table. Phospholipid molecular species identified in optic nerve tissue at 3 weeks post injury by LC/MS.** Mass estimate (m/z) for each specie was obtained either in positive ion mode [M+H]<sup>+</sup> or in negative ion mode [M-H]<sup>-</sup>. Mean values and standard deviations are expressed in µg/sample. Significant change is calculated by t-test and the level of significance indicated with asterisks (\* - p<0.05, \*\* - p<0.01, \*\*\* - p<0.001).

**A. Ether Phosphatidylcholine (ePC)**

|           | Name      | [M+H] <sup>+</sup> | r-sham (n=5) |       |            | r-mTBI (n = 5) |       |            | % change | Sign. change |
|-----------|-----------|--------------------|--------------|-------|------------|----------------|-------|------------|----------|--------------|
|           |           |                    | Mean         | SD    | % of total | Mean           | SD    | % of total |          |              |
| 1         | ePC(32:0) | 720.6              | 0.073        | 0.022 | 5.9%       | 0.101          | 0.013 | 7.6%       | 38.7%    |              |
| 2         | ePC(32:1) | 718.6              | 0.050        | 0.011 | 4.1%       | 0.061          | 0.009 | 4.6%       | 21.2%    |              |
| 3         | ePC(32:2) | 716.6              | 0.018        | 0.004 | 1.5%       | 0.017          | 0.004 | 1.3%       | -7.0%    |              |
| 4         | ePC(34:0) | 748.6              | 0.075        | 0.015 | 6.1%       | 0.058          | 0.013 | 4.4%       | -22.6%   |              |
| 5         | ePC(34:2) | 744.6              | 0.080        | 0.016 | 6.5%       | 0.097          | 0.014 | 7.3%       | 21.6%    |              |
| 6         | ePC(36:0) | 776.6              | 0.060        | 0.019 | 4.8%       | 0.064          | 0.030 | 4.8%       | 8.1%     |              |
| 7         | ePC(36:2) | 772.6              | 0.061        | 0.008 | 5.0%       | 0.024          | 0.018 | 1.8%       | -61.2%   | **           |
| 8         | ePC(36:3) | 770.6              | 0.031        | 0.007 | 2.5%       | 0.039          | 0.008 | 2.9%       | 25.8%    |              |
| 9         | ePC(36:4) | 768.6              | 0.041        | 0.011 | 3.3%       | 0.065          | 0.013 | 4.9%       | 56.9%    | *            |
| 10        | ePC(36:5) | 766.6              | 0.034        | 0.007 | 2.8%       | 0.048          | 0.009 | 3.6%       | 38.2%    | *            |
| 11        | ePC(38:0) | 804.7              | 0.042        | 0.013 | 3.4%       | 0.050          | 0.016 | 3.8%       | 20.2%    |              |
| 12        | ePC(38:1) | 802.7              | 0.147        | 0.032 | 11.9%      | 0.136          | 0.030 | 10.2%      | -6.9%    |              |
| 13        | ePC(38:2) | 800.6              | 0.097        | 0.021 | 7.8%       | 0.078          | 0.018 | 5.9%       | -18.9%   |              |
| 14        | ePC(38:3) | 798.6              | 0.077        | 0.018 | 6.3%       | 0.083          | 0.021 | 6.2%       | 7.4%     |              |
| 15        | ePC(38:5) | 794.6              | 0.054        | 0.016 | 4.4%       | 0.098          | 0.021 | 7.4%       | 80.3%    | **           |
| 16        | ePC(38:6) | 792.6              | 0.082        | 0.023 | 6.6%       | 0.097          | 0.026 | 7.3%       | 19.1%    |              |
| 17        | ePC(40:2) | 828.7              | 0.061        | 0.014 | 4.9%       | 0.055          | 0.014 | 4.1%       | -9.2%    |              |
| 18        | ePC(40:3) | 826.7              | 0.039        | 0.010 | 3.2%       | 0.035          | 0.010 | 2.7%       | -10.1%   |              |
| 19        | ePC(40:4) | 824.6              | 0.031        | 0.010 | 2.5%       | 0.034          | 0.010 | 2.5%       | 9.0%     |              |
| 20        | ePC(40:5) | 822.6              | 0.033        | 0.009 | 2.7%       | 0.034          | 0.010 | 2.6%       | 3.7%     |              |
| 21        | ePC(40:6) | 820.6              | 0.048        | 0.016 | 3.9%       | 0.056          | 0.016 | 4.2%       | 18.5%    |              |
| TOTAL ePC |           |                    | 1.234        |       |            | 1.332          |       |            |          |              |

**B. Ether Lysophosphatidylcholine (eLPC)**

|            | Name       | [M+H] <sup>+</sup> | r-sham (n=5) |       |            | r-mTBI (n = 5) |       |            | % change | sign. change |
|------------|------------|--------------------|--------------|-------|------------|----------------|-------|------------|----------|--------------|
|            |            |                    | Mean         | SD    | % of total | Mean           | SD    | % of total |          |              |
| 1          | eLPC(16:1) | 480.3              | 0.013        | 0.012 | 0.009      | 0.016          | 0.003 | 12.5%      | 23.1%    | **           |
| 2          | eLPC(16:0) | 482.4              | 0.019        | 0.02  | 0.017      | 0.047          | 0.001 | 36.4%      | 146.1%   | ***          |
| 3          | eLPC(18:1) | 508.4              | 0.014        | 0.011 | 0.016      | 0.018          | 0.003 | 13.8%      | 26.8%    | *            |
| 4          | eLPC(18:0) | 510.4              | 0.016        | 0.017 | 0.016      | 0.048          | 0.006 | 37.4%      | 200.0%   | ***          |
| TOTAL eLPC |            |                    | 0.062        |       |            | 0.129          |       |            |          | ***          |

C. Ether Phosphatydilethanolamine (ePE)

|           | Name      | [M-H] <sup>-</sup> | r-sham (n=5) |       |            | r-mTBI (n = 5) |       |            | % change | sign. change |
|-----------|-----------|--------------------|--------------|-------|------------|----------------|-------|------------|----------|--------------|
|           |           |                    | Mean         | SD    | % of total | Mean           | SD    | % of total |          |              |
| 1         | ePE(32:1) | 674.5              | 0.937        | 0.286 | 3.7%       | 0.711          | 0.296 | 3.5%       | -24.1%   |              |
| 2         | ePE(32:2) | 672.5              | 0.095        | 0.024 | 0.4%       | 0.121          | 0.044 | 0.6%       | 27.0%    |              |
| 3         | ePE(32:3) | 670.5              | 0.041        | 0.009 | 0.2%       | 0.034          | 0.007 | 0.2%       | -16.8%   |              |
| 4         | ePE(34:1) | 702.6              | 1.023        | 0.265 | 4.0%       | 0.725          | 0.286 | 3.6%       | -29.1%   |              |
| 5         | ePE(34:2) | 700.5              | 2.442        | 0.488 | 9.6%       | 1.932          | 0.564 | 9.5%       | -20.9%   |              |
| 6         | ePE(34:3) | 698.5              | 0.149        | 0.035 | 0.6%       | 0.139          | 0.041 | 0.7%       | -6.8%    |              |
| 7         | ePE(34:4) | 696.5              | 0.184        | 0.042 | 0.7%       | 0.147          | 0.043 | 0.7%       | -20.3%   |              |
| 8         | ePE(36:0) | 732.6              | 0.080        | 0.022 | 0.3%       | 0.060          | 0.008 | 0.3%       | -24.5%   |              |
| 9         | ePE(36:1) | 730.6              | 0.416        | 0.076 | 1.6%       | 0.310          | 0.104 | 1.5%       | -25.5%   |              |
| 10        | ePE(36:2) | 728.6              | 3.030        | 0.472 | 11.9%      | 2.372          | 0.745 | 11.7%      | -21.7%   |              |
| 11        | ePE(36:3) | 726.6              | 2.828        | 0.455 | 11.1%      | 2.434          | 0.726 | 12.0%      | -14.0%   |              |
| 12        | ePE(36:4) | 724.5              | 0.599        | 0.121 | 2.4%       | 0.448          | 0.145 | 2.2%       | -25.1%   |              |
| 13        | ePE(36:5) | 722.5              | 0.434        | 0.071 | 1.7%       | 0.424          | 0.109 | 2.1%       | -2.4%    |              |
| 14        | ePE(38:0) | 760.6              | 0.130        | 0.020 | 0.5%       | 0.138          | 0.027 | 0.7%       | 6.4%     |              |
| 15        | ePE(38:1) | 758.6              | 0.315        | 0.058 | 1.2%       | 0.259          | 0.064 | 1.3%       | -17.6%   |              |
| 16        | ePE(38:2) | 756.6              | 1.566        | 0.228 | 6.2%       | 1.198          | 0.346 | 5.9%       | -23.5%   |              |
| 17        | ePE(38:3) | 754.6              | 1.837        | 0.306 | 7.2%       | 1.468          | 0.466 | 7.2%       | -20.1%   |              |
| 18        | ePE(38:4) | 752.6              | 0.830        | 0.126 | 3.3%       | 0.615          | 0.226 | 3.0%       | -25.9%   |              |
| 19        | ePE(38:5) | 750.6              | 2.039        | 0.325 | 8.0%       | 1.679          | 0.620 | 8.3%       | -17.6%   |              |
| 20        | ePE(38:6) | 748.5              | 1.289        | 0.181 | 5.1%       | 1.045          | 0.376 | 5.1%       | -18.9%   |              |
| 21        | ePE(40:2) | 784.6              | 0.302        | 0.053 | 1.2%       | 0.258          | 0.079 | 1.3%       | -14.4%   |              |
| 22        | ePE(40:3) | 782.6              | 0.514        | 0.081 | 2.0%       | 0.420          | 0.125 | 2.1%       | -18.2%   |              |
| 23        | ePE(40:4) | 780.6              | 0.485        | 0.080 | 1.9%       | 0.428          | 0.159 | 2.1%       | -11.7%   |              |
| 24        | ePE(40:5) | 778.6              | 1.859        | 0.296 | 7.3%       | 1.431          | 0.582 | 7.0%       | -23.0%   |              |
| 25        | ePE(40:6) | 776.6              | 1.968        | 0.308 | 7.8%       | 1.551          | 0.644 | 7.6%       | -21.2%   |              |
| TOTAL ePE |           |                    | 25.4         |       |            | 20.349         |       |            |          |              |

D. ether Lysophosphatydilethanolamine (eLPE)

| N          | Name       | [M-H] <sup>-</sup> | r-sham (n=5) |       |            | r-mTBI (n = 5) |       |            | % change | sign. change |
|------------|------------|--------------------|--------------|-------|------------|----------------|-------|------------|----------|--------------|
|            |            |                    | Mean         | SD    | % of total | Mean           | SD    | % of total |          |              |
| 1          | eLPE(16:0) | 438.3              | 0.014        | 0.004 | 3.0%       | 0.016          | 0.007 | 2.4%       | 20.8%    |              |
| 2          | eLPE(16:1) | 436.3              | 0.048        | 0.013 | 10.6%      | 0.078          | 0.010 | 11.5%      | 59.9%    | **           |
| 3          | eLPE(16:2) | 434.3              | 0.013        | 0.004 | 2.9%       | 0.012          | 0.005 | 1.8%       | -11.3%   |              |
| 4          | eLPE(18:0) | 466.3              | 0.016        | 0.002 | 3.5%       | 0.026          | 0.008 | 3.8%       | 61.8%    | *            |
| 5          | eLPE(18:1) | 464.3              | 0.097        | 0.025 | 21.1%      | 0.164          | 0.053 | 24.4%      | 69.8%    | **           |
| 6          | eLPE(18:2) | 462.3              | 0.147        | 0.023 | 32.1%      | 0.239          | 0.068 | 35.6%      | 62.3%    | **           |
| 7          | eLPE(20:0) | 494.4              | 0.066        | 0.018 | 14.4%      | 0.062          | 0.016 | 9.2%       | -6.2%    |              |
| 9          | eLPE(20:2) | 490.3              | 0.057        | 0.022 | 12.5%      | 0.076          | 0.034 | 11.3%      | 32.0%    |              |
| TOTAL eLPE |            |                    | 0.458        |       |            | 0.672          |       |            |          | *            |

E. Phosphatidylcholine (PC)

| N        | Name      | [M+H] <sup>+</sup> | r-sham (n=5) |       |            | r-mTBI (n = 4) |       |            | % change | Sign. change |
|----------|-----------|--------------------|--------------|-------|------------|----------------|-------|------------|----------|--------------|
|          |           |                    | Mean         | SD    | % of total | Mean           | SD    | % of total |          |              |
| 1        | PC(30:0)  | 706.5              | 0.392        | 0.090 | 1.3%       | 0.374          | 0.088 | 1.6%       | -4.7%    |              |
| 2        | PC(32:0)  | 734.6              | 2.841        | 0.850 | 9.3%       | 1.901          | 0.590 | 8.0%       | -33.1%   |              |
| 3        | PC(32:1)  | 732.5              | 0.357        | 0.119 | 1.2%       | 0.235          | 0.193 | 1.0%       | -34.2%   |              |
| 4        | PC(32:2)  | 730.5              | 0.012        | 0.003 | 0.0%       | 0.014          | 0.004 | 0.1%       | 18.8%    |              |
| 5        | PC(34:0)  | 762.6              | 0.966        | 0.213 | 3.2%       | 0.497          | 0.292 | 2.1%       | -48.6%   | **           |
| 6        | PC(34:1)  | 760.6              | 10.191       | 1.891 | 33.5%      | 8.028          | 2.315 | 33.8%      | -21.2%   |              |
| 7        | PC(34:2)  | 758.6              | 0.317        | 0.072 | 1.0%       | 0.181          | 0.079 | 0.8%       | -42.8%   | *            |
| 8        | PC(34:3)  | 756.5              | 0.054        | 0.016 | 0.2%       | 0.029          | 0.011 | 0.1%       | -46.3%   | *            |
| 9        | PC(34:4)  | 754.5              | 0.008        | 0.003 | 0.0%       | 0.009          | 0.004 | 0.0%       | 12.5%    |              |
| 10       | PC(36:0)  | 790.6              | 0.367        | 0.097 | 1.2%       | 0.291          | 0.104 | 1.2%       | -20.8%   |              |
| 11       | PC(36:1)  | 788.6              | 6.644        | 1.416 | 21.8%      | 5.180          | 1.493 | 21.8%      | -22.0%   |              |
| 12       | PC(36:3)  | 784.6              | 0.196        | 0.039 | 0.6%       | 0.150          | 0.040 | 0.6%       | -23.6%   |              |
| 13       | PC(36:4)  | 782.6              | 0.950        | 0.193 | 3.1%       | 1.145          | 0.220 | 4.8%       | 20.5%    |              |
| 14       | PC(36:5)  | 780.5              | 0.021        | 0.004 | 0.1%       | 0.032          | 0.008 | 0.1%       | 50.0%    | *            |
| 15       | PC(38:0)  | 818.7              | 0.082        | 0.023 | 0.3%       | 0.086          | 0.020 | 0.4%       | 4.9%     |              |
| 16       | PC(38:1)  | 816.6              | 0.726        | 0.152 | 2.4%       | 0.550          | 0.175 | 2.3%       | -24.3%   |              |
| 17       | PC(38:2)  | 814.6              | 0.465        | 0.085 | 1.5%       | 0.298          | 0.129 | 1.3%       | -36.0%   | *            |
| 18       | PC(38:3)  | 812.6              | 0.287        | 0.058 | 0.9%       | 0.221          | 0.078 | 0.9%       | -23.2%   |              |
| 19       | PC(38:4)  | 810.6              | 1.564        | 0.371 | 5.1%       | 1.342          | 0.357 | 5.7%       | -14.2%   |              |
| 20       | PC(38:5)  | 808.6              | 0.478        | 0.094 | 1.6%       | 0.401          | 0.114 | 1.7%       | -16.1%   |              |
| 21       | PC(38:6)  | 806.6              | 0.576        | 0.131 | 1.9%       | 0.513          | 0.133 | 2.2%       | -10.9%   |              |
| 22       | PC(40:2)  | 842.7              | 0.217        | 0.051 | 0.7%       | 0.170          | 0.057 | 0.7%       | -21.8%   |              |
| 23       | PC(40:3)  | 840.6              | 0.111        | 0.027 | 0.4%       | 0.097          | 0.035 | 0.4%       | -12.8%   |              |
| 24       | PC(40:4)  | 838.6              | 0.322        | 0.077 | 1.1%       | 0.230          | 0.087 | 1.0%       | -28.7%   |              |
| 25       | PC(40:5)  | 836.6              | 0.328        | 0.072 | 1.1%       | 0.218          | 0.102 | 0.9%       | -33.5%   |              |
| 26       | PC(40:6)  | 834.6              | 0.714        | 0.176 | 2.3%       | 0.421          | 0.223 | 1.8%       | -41.0%   | *            |
| 27       | PC(40:7)  | 832.6              | 0.157        | 0.042 | 0.5%       | 0.115          | 0.043 | 0.5%       | -26.8%   |              |
| 28       | PC(40:8)  | 830.6              | 0.118        | 0.026 | 0.4%       | 0.137          | 0.019 | 0.6%       | 15.7%    |              |
| 29       | PC(42:10) | 854.6              | 0.048        | 0.012 | 0.2%       | 0.051          | 0.012 | 0.2%       | 5.7%     |              |
| 30       | PC(42:11) | 852.5              | 0.016        | 0.005 | 0.1%       | 0.023          | 0.006 | 0.1%       | 42.2%    |              |
| 31       | PC(42:2)  | 870.7              | 0.174        | 0.051 | 0.6%       | 0.150          | 0.041 | 0.6%       | -13.6%   |              |
| 32       | PC(42:3)  | 868.7              | 0.019        | 0.006 | 0.1%       | 0.017          | 0.007 | 0.1%       | -11.8%   |              |
| 33       | PC(42:4)  | 866.7              | 0.054        | 0.014 | 0.2%       | 0.046          | 0.015 | 0.2%       | -14.8%   |              |
| 34       | PC(42:5)  | 864.6              | 0.057        | 0.013 | 0.2%       | 0.036          | 0.019 | 0.2%       | -36.4%   | *            |
| 35       | PC(42:6)  | 862.6              | 0.033        | 0.009 | 0.1%       | 0.021          | 0.009 | 0.1%       | -37.1%   |              |
| 36       | PC(42:7)  | 860.6              | 0.070        | 0.019 | 0.2%       | 0.043          | 0.021 | 0.2%       | -38.6%   |              |
| 37       | PC(42:8)  | 858.6              | 0.114        | 0.037 | 0.4%       | 0.136          | 0.024 | 0.6%       | 19.1%    |              |
| 38       | PC(42:9)  | 856.6              | 0.083        | 0.022 | 0.3%       | 0.090          | 0.018 | 0.4%       | 8.1%     |              |
| 39       | PC(44:10) | 882.6              | 0.028        | 0.008 | 0.1%       | 0.020          | 0.008 | 0.1%       | -29.5%   |              |
| 40       | PC(44:11) | 880.6              | 0.026        | 0.009 | 0.1%       | 0.035          | 0.009 | 0.1%       | 35.6%    |              |
| 41       | PC(44:12) | 878.6              | 0.039        | 0.013 | 0.1%       | 0.029          | 0.013 | 0.1%       | -26.9%   |              |
| 42       | PC(44:2)  | 898.7              | 0.039        | 0.013 | 0.1%       | 0.021          | 0.015 | 0.1%       | -46.8%   | *            |
| 43       | PC(44:4)  | 894.7              | 0.042        | 0.012 | 0.1%       | 0.040          | 0.014 | 0.2%       | -5.4%    |              |
| 44       | PC(44:5)  | 892.7              | 0.045        | 0.013 | 0.1%       | 0.056          | 0.014 | 0.2%       | 25.0%    |              |
| 45       | PC(44:6)  | 890.7              | 0.012        | 0.004 | 0.0%       | 0.010          | 0.004 | 0.0%       | -18.8%   |              |
| 46       | PC(44:8)  | 886.6              | 0.031        | 0.008 | 0.1%       | 0.031          | 0.009 | 0.1%       | 0.0%     |              |
| 47       | PC(44:9)  | 884.6              | 0.039        | 0.012 | 0.1%       | 0.029          | 0.013 | 0.1%       | -25.0%   |              |
| TOTAL PC |           |                    | 30.430       |       |            | 23.742         |       |            |          |              |

F. Lysophosphatidylcholine (LPC)

| N         | Name      | [M+H] <sup>+</sup> | r-sham (n=5) |       |            | r-mTBI (n = 5) |       |            | % change | Sign. change |
|-----------|-----------|--------------------|--------------|-------|------------|----------------|-------|------------|----------|--------------|
|           |           |                    | Mean         | SD    | % of total | Mean           | SD    | % of total |          |              |
| 1         | LPC(16:1) | 494.3              | 0.010        | 0.003 | 0.5%       | 0.015          | 0.004 | 0.6%       | 58.6%    |              |
| 2         | LPC(16:0) | 496.3              | 0.717        | 0.200 | 39.1%      | 1.222          | 0.244 | 51.0%      | 70.4%    | *            |
| 3         | LPC(18:2) | 520.3              | 0.018        | 0.001 | 1.0%       | 0.017          | 0.004 | 0.7%       | -5.0%    |              |
| 4         | LPC(18:1) | 522.4              | 0.309        | 0.089 | 16.8%      | 0.336          | 0.022 | 14.0%      | 8.9%     |              |
| 5         | LPC(18:0) | 524.4              | 0.652        | 0.115 | 35.5%      | 0.738          | 0.012 | 30.8%      | 13.3%    |              |
| 6         | LPC(20:5) | 542.3              | 0.012        | 0.002 | 0.6%       | 0.007          | 0.002 | 0.3%       | -44.0%   | *            |
| 7         | LPC(20:1) | 550.4              | 0.042        | 0.011 | 2.3%       | 0.026          | 0.002 | 1.1%       | -38.4%   | *            |
| 8         | LPC(20:0) | 552.4              | 0.049        | 0.013 | 2.6%       | 0.020          | 0.002 | 0.8%       | -58.4%   | *            |
| 9         | LPC(22:6) | 568.3              | 0.019        | 0.005 | 1.0%       | 0.011          | 0.003 | 0.5%       | -41.7%   | *            |
| 10        | LPC(22:5) | 570.4              | 0.009        | 0.003 | 0.5%       | 0.003          | 0.002 | 0.1%       | -64.2%   | **           |
| TOTAL LPC |           |                    | 1.836        |       |            | 2.396          |       |            |          | **           |

G. Phosphatidylethanolamine (PE)

| N  | Name      | [M-H] <sup>-</sup> | r-sham (n=5) |       |            | r-mTBI (n = 5) |       |            | % change | sign. change |
|----|-----------|--------------------|--------------|-------|------------|----------------|-------|------------|----------|--------------|
|    |           |                    | Mean         | SD    | % of total | Mean           | SD    | % of total |          |              |
| 1  | PE(30:0)  | 662.5              | 0.024        | 0.006 | 0.2%       | 0.019          | 0.005 | 0.2%       | -19.7%   |              |
| 2  | PE(30:1)  | 660.5              | 0.023        | 0.005 | 0.2%       | 0.022          | 0.004 | 0.2%       | -7.2%    |              |
| 3  | PE(32:0)  | 690.5              | 0.036        | 0.009 | 0.2%       | 0.027          | 0.006 | 0.2%       | -23.2%   |              |
| 4  | PE(32:1)  | 688.5              | 0.050        | 0.013 | 0.3%       | 0.050          | 0.013 | 0.4%       | 0.0%     |              |
| 5  | PE(32:2)  | 686.5              | 0.031        | 0.006 | 0.2%       | 0.036          | 0.006 | 0.3%       | 14.6%    |              |
| 6  | PE(34:0)  | 718.5              | 0.048        | 0.013 | 0.3%       | 0.038          | 0.008 | 0.3%       | -21.9%   |              |
| 7  | PE(34:1)  | 716.5              | 0.734        | 0.201 | 4.9%       | 0.504          | 0.177 | 4.3%       | -31.3%   |              |
| 8  | PE(34:2)  | 714.5              | 0.297        | 0.048 | 2.0%       | 0.280          | 0.067 | 2.4%       | -5.9%    |              |
| 9  | PE(34:3)  | 712.5              | 0.129        | 0.029 | 0.9%       | 0.115          | 0.029 | 1.0%       | -10.7%   |              |
| 10 | PE(34:4)  | 710.5              | 0.084        | 0.023 | 0.6%       | 0.065          | 0.019 | 0.6%       | -22.4%   |              |
| 11 | PE(36:0)  | 746.6              | 0.334        | 0.084 | 2.2%       | 0.450          | 0.135 | 3.8%       | 34.9%    |              |
| 12 | PE(36:1)  | 744.6              | 1.732        | 0.386 | 11.6%      | 1.095          | 0.455 | 9.3%       | -36.8%   | *            |
| 13 | PE(36:2)  | 742.5              | 0.859        | 0.199 | 5.8%       | 0.505          | 0.145 | 4.3%       | -41.2%   | *            |
| 14 | PE(36:3)  | 740.5              | 0.194        | 0.040 | 1.3%       | 0.171          | 0.034 | 1.5%       | -12.1%   |              |
| 15 | PE(36:4)  | 738.5              | 0.327        | 0.060 | 2.2%       | 0.303          | 0.075 | 2.6%       | -7.4%    |              |
| 16 | PE(36:5)  | 736.5              | 0.159        | 0.038 | 1.1%       | 0.145          | 0.038 | 1.2%       | -8.5%    |              |
| 17 | PE(36:6)  | 734.5              | 0.075        | 0.015 | 0.5%       | 0.062          | 0.017 | 0.5%       | -17.0%   |              |
| 18 | PE(38:0)  | 774.6              | 1.523        | 0.343 | 10.2%      | 1.273          | 0.489 | 10.9%      | -16.4%   |              |
| 19 | PE(38:1)  | 772.6              | 0.843        | 0.170 | 5.7%       | 0.829          | 0.320 | 7.1%       | -1.6%    |              |
| 20 | PE(38:2)  | 770.6              | 0.437        | 0.084 | 2.9%       | 0.275          | 0.075 | 2.3%       | -37.0%   | *            |
| 21 | PE(38:3)  | 768.6              | 0.306        | 0.053 | 2.1%       | 0.227          | 0.067 | 1.9%       | -25.9%   |              |
| 22 | PE(38:4)  | 766.5              | 1.520        | 0.300 | 10.2%      | 1.152          | 0.363 | 9.8%       | -24.2%   |              |
| 23 | PE(38:5)  | 764.5              | 0.511        | 0.076 | 3.4%       | 0.382          | 0.115 | 3.3%       | -25.3%   |              |
| 24 | PE(38:6)  | 762.5              | 0.379        | 0.076 | 2.5%       | 0.256          | 0.086 | 2.2%       | -32.5%   | *            |
| 25 | PE(40:2)  | 798.6              | 0.215        | 0.053 | 1.4%       | 0.198          | 0.057 | 1.7%       | -7.9%    |              |
| 26 | PE(40:3)  | 796.6              | 0.239        | 0.050 | 1.6%       | 0.229          | 0.074 | 2.0%       | -4.3%    |              |
| 27 | PE(40:4)  | 794.6              | 0.609        | 0.114 | 4.1%       | 0.404          | 0.127 | 3.4%       | -33.6%   | *            |
| 28 | PE(40:5)  | 792.6              | 0.335        | 0.051 | 2.2%       | 0.211          | 0.072 | 1.8%       | -37.0%   | *            |
| 29 | PE(40:6)  | 790.5              | 0.890        | 0.210 | 6.0%       | 0.556          | 0.187 | 4.7%       | -37.5%   | *            |
| 30 | PE(40:7)  | 788.5              | 0.146        | 0.031 | 1.0%       | 0.109          | 0.032 | 0.9%       | -25.6%   |              |
| 31 | PE(40:8)  | 786.5              | 0.122        | 0.034 | 0.8%       | 0.117          | 0.031 | 1.0%       | -3.9%    |              |
| 32 | PE(42:10) | 810.5              | 0.253        | 0.054 | 1.7%       | 0.255          | 0.089 | 2.2%       | 0.7%     |              |
| 33 | PE(42:4)  | 822.6              | 0.163        | 0.038 | 1.1%       | 0.158          | 0.053 | 1.4%       | -3.0%    |              |
| 34 | PE(42:5)  | 820.6              | 0.107        | 0.015 | 0.7%       | 0.093          | 0.026 | 0.8%       | -12.2%   |              |
| 35 | PE(42:6)  | 818.6              | 0.079        | 0.020 | 0.5%       | 0.066          | 0.019 | 0.6%       | -16.5%   |              |
| 36 | PE(42:7)  | 816.6              | 0.067        | 0.020 | 0.4%       | 0.059          | 0.020 | 0.5%       | -10.7%   |              |
| 37 | PE(42:8)  | 814.5              | 0.097        | 0.036 | 0.7%       | 0.090          | 0.031 | 0.8%       | -8.1%    |              |
| 38 | PE(42:9)  | 812.5              | 0.126        | 0.040 | 0.8%       | 0.121          | 0.038 | 1.0%       | -4.0%    |              |
| 39 | PE(44:10) | 838.5              | 0.139        | 0.030 | 0.9%       | 0.119          | 0.037 | 1.0%       | -14.4%   |              |
| 40 | PE(44:11) | 836.5              | 0.144        | 0.033 | 1.0%       | 0.162          | 0.066 | 1.4%       | 12.4%    |              |
| 41 | PE(44:12) | 834.5              | 0.168        | 0.034 | 1.1%       | 0.185          | 0.077 | 1.6%       | 10.3%    |              |
| 42 | PE(44:4)  | 850.6              | 0.078        | 0.022 | 0.5%       | 0.066          | 0.029 | 0.6%       | -14.8%   |              |
| 43 | PE(44:8)  | 842.6              | 0.095        | 0.035 | 0.6%       | 0.074          | 0.030 | 0.6%       | -22.3%   |              |
| 44 | PE(44:9)  | 840.6              | 0.097        | 0.032 | 0.7%       | 0.089          | 0.030 | 0.8%       | -8.1%    |              |

TOTAL PE 14.825

11.644

I. Lysophosphatidylethanolamine (LPE)

| N         | Name      | [M-H] <sup>-</sup> | r-sham (n=5) |       |            | r-mTBI (n = 5) |       |            | % change | sign. change |
|-----------|-----------|--------------------|--------------|-------|------------|----------------|-------|------------|----------|--------------|
|           |           |                    | Mean         | SD    | % of total | Mean           | SD    | % of total |          |              |
| 1         | LPE(16:0) | 452.3              | 0.109        | 0.021 | 2.4%       | 0.130          | 0.020 | 3.1%       | 19.1%    |              |
| 2         | LPE(16:1) | 450.3              | 0.034        | 0.009 | 0.7%       | 0.038          | 0.007 | 0.9%       | 13.1%    |              |
| 3         | LPE(18:0) | 480.3              | 0.158        | 0.012 | 3.4%       | 0.186          | 0.038 | 4.5%       | 18.0%    |              |
| 4         | LPE(18:1) | 478.3              | 0.665        | 0.221 | 14.4%      | 0.640          | 0.131 | 15.4%      | -3.7%    |              |
| 5         | LPE(18:2) | 476.3              | 0.023        | 0.007 | 0.5%       | 0.020          | 0.003 | 0.5%       | -13.7%   |              |
| 6         | LPE(18:4) | 472.3              | 0.027        | 0.010 | 0.6%       | 0.020          | 0.004 | 0.5%       | -25.0%   |              |
| 7         | LPE(20:0) | 508.4              | 0.048        | 0.014 | 1.0%       | 0.037          | 0.005 | 0.9%       | -23.0%   |              |
| 8         | LPE(20:1) | 506.3              | 1.071        | 0.257 | 23.1%      | 0.922          | 0.271 | 22.2%      | -13.9%   |              |
| 9         | LPE(20:2) | 504.3              | 0.069        | 0.017 | 1.5%       | 0.054          | 0.008 | 1.3%       | -21.9%   |              |
| 10        | LPE(20:3) | 502.3              | 0.054        | 0.005 | 1.2%       | 0.046          | 0.012 | 1.1%       | -15.1%   |              |
| 11        | LPE(20:4) | 500.3              | 0.190        | 0.032 | 4.1%       | 0.187          | 0.045 | 4.5%       | -2.0%    |              |
| 12        | LPE(20:5) | 498.3              | 0.110        | 0.030 | 2.4%       | 0.084          | 0.027 | 2.0%       | -23.9%   |              |
| 13        | LPE(22:0) | 536.4              | 0.076        | 0.023 | 1.6%       | 0.065          | 0.012 | 1.6%       | -14.8%   |              |
| 14        | LPE(22:1) | 534.4              | 0.436        | 0.102 | 9.4%       | 0.356          | 0.115 | 8.6%       | -18.3%   |              |
| 15        | LPE(22:2) | 532.4              | 0.088        | 0.015 | 1.9%       | 0.091          | 0.025 | 2.2%       | 3.0%     |              |
| 16        | LPE(22:3) | 530.3              | 0.074        | 0.020 | 1.6%       | 0.072          | 0.031 | 1.7%       | -3.1%    |              |
| 17        | LPE(22:4) | 528.3              | 0.459        | 0.069 | 9.9%       | 0.394          | 0.122 | 9.5%       | -14.2%   |              |
| 18        | LPE(22:5) | 526.3              | 0.036        | 0.006 | 0.8%       | 0.032          | 0.006 | 0.8%       | -9.4%    |              |
| 19        | LPE(22:6) | 524.3              | 0.121        | 0.043 | 2.6%       | 0.125          | 0.034 | 3.0%       | 3.0%     |              |
| 20        | LPE(24:0) | 564.4              | 0.058        | 0.020 | 1.3%       | 0.053          | 0.014 | 1.3%       | -9.0%    |              |
| 21        | LPE(24:3) | 558.4              | 0.059        | 0.010 | 1.3%       | 0.052          | 0.016 | 1.3%       | -12.0%   |              |
| 22        | LPE(24:4) | 556.4              | 0.364        | 0.071 | 7.9%       | 0.273          | 0.113 | 6.6%       | -25.1%   |              |
| 23        | LPE(24:5) | 554.3              | 0.054        | 0.009 | 1.2%       | 0.045          | 0.014 | 1.1%       | -17.3%   |              |
| 24        | LPE(24:6) | 552.3              | 0.160        | 0.033 | 3.4%       | 0.153          | 0.060 | 3.7%       | -4.2%    |              |
| 25        | LPE(26:3) | 586.4              | 0.088        | 0.019 | 1.9%       | 0.074          | 0.012 | 1.8%       | -16.7%   |              |
| TOTAL LPE |           |                    | 4.632        |       |            | 4.147          |       |            | -10.5%   |              |

J. Phosphatidylinositol (PI)

| N        | Name          | [M-H] <sup>-</sup> | r-sham (n=5) |       |            | r-mTBI (n = 5) |       |            | % change | sign. change |
|----------|---------------|--------------------|--------------|-------|------------|----------------|-------|------------|----------|--------------|
|          |               |                    | Mean         | SD    | % of total | Mean           | SD    | % of total |          |              |
| 1        | PI(16:0-18:1) | 835                | 0.056        | 0.015 | 2.8%       | 0.047          | 0.014 | 3.2%       | -16.2%   |              |
| 2        | PI(16:0-20:4) | 857                | 0.297        | 0.076 | 14.9%      | 0.229          | 0.061 | 15.7%      | -22.8%   |              |
| 3        | PI(18:1-20:4) | 883                | 0.188        | 0.050 | 9.4%       | 0.115          | 0.032 | 7.9%       | -38.7%   | *            |
| 4        | PI(18:0-20:4) | 885                | 1.358        | 0.394 | 68.3%      | 1.002          | 0.237 | 68.7%      | -26.3%   |              |
| 5        | PI(18:0-22:6) | 909                | 0.055        | 0.014 | 2.7%       | 0.040          | 0.010 | 2.7%       | -27.3%   |              |
| 6        | PI(20:0-22:4) | 913                | 0.036        | 0.009 | 1.8%       | 0.026          | 0.007 | 1.8%       | -29.6%   |              |
| TOTAL PI |               |                    | 1.989        |       |            | 1.458          |       |            |          |              |

K. PE-Creamide (PE-Cer)

| N            | Name         | [M-H] <sup>-</sup> | r-sham (n=5) |       |            | r-mTBI (n = 5) |       |            | % change | sign. change |
|--------------|--------------|--------------------|--------------|-------|------------|----------------|-------|------------|----------|--------------|
|              |              |                    | Mean         | SD    | % of total | Mean           | SD    | % of total |          |              |
| 1            | PE-Cer(16:0) | 659.5              | 0.092        | 0.027 | 13.1%      | 0.090          | 0.033 | 13.6%      | -2.2%    |              |
| 2            | PE-Cer(16:1) | 657.5              | 0.140        | 0.049 | 20.1%      | 0.142          | 0.048 | 21.6%      | 1.2%     |              |
| 3            | PE-Cer(18:0) | 687.5              | 0.119        | 0.038 | 17.0%      | 0.115          | 0.048 | 17.4%      | -3.2%    |              |
| 4            | PE-Cer(18:1) | 685.5              | 0.281        | 0.094 | 40.3%      | 0.242          | 0.088 | 36.7%      | -14.0%   |              |
| 5            | PE-Cer(24:0) | 771.6              | 0.066        | 0.019 | 9.4%       | 0.071          | 0.024 | 10.7%      | 7.3%     |              |
| Total PE-Cer |              |                    | 0.697        |       |            | 0.659          |       |            |          |              |

L. Sphingomyelin (SM)

| N        | Name     | [M+H] <sup>+</sup> | r-sham (n=5) |       |            | r-mTBI (n = 5) |       |            | % change | sign. change |
|----------|----------|--------------------|--------------|-------|------------|----------------|-------|------------|----------|--------------|
|          |          |                    | Mean         | SD    | % of total | Mean           | SD    | % of total |          |              |
| 1        | SM(16:1) | 701.5              | 0.013        | 0.002 | 1.49%      | 0.012          | 0.005 | 1.14%      | -11.8%   |              |
| 2        | SM(16:0) | 703.6              | 0.232        | 0.030 | 26.05%     | 0.317          | 0.110 | 30.82%     | 36.6%    |              |
| 3        | SM(18:1) | 729.6              | 0.033        | 0.006 | 3.72%      | 0.036          | 0.012 | 3.53%      | 9.8%     |              |
| 4        | SM(18:0) | 731.6              | 0.208        | 0.042 | 23.34%     | 0.171          | 0.018 | 16.65%     | -17.6%   |              |
| 5        | SM(22:1) | 785.6              | 0.033        | 0.005 | 3.70%      | 0.043          | 0.016 | 4.15%      | 29.8%    |              |
| 6        | SM(22:0) | 787.7              | 0.063        | 0.010 | 7.04%      | 0.054          | 0.006 | 5.30%      | -13.1%   |              |
| 7        | SM(24:1) | 813.7              | 0.241        | 0.037 | 27.10%     | 0.339          | 0.146 | 32.92%     | 40.3%    |              |
| 8        | SM(24:0) | 815.7              | 0.067        | 0.012 | 7.57%      | 0.056          | 0.006 | 5.48%      | -16.3%   |              |
| Total SM |          |                    | 0.89         |       |            | 1.03           |       |            | 7.2%     |              |

M. Dehydrosphingomyelin (DSM)

| N         | Name      | [M+H] <sup>+</sup> | r-sham (n=5) |       |            | r-mTBI (n = 5) |       |            | % change | sign. change |
|-----------|-----------|--------------------|--------------|-------|------------|----------------|-------|------------|----------|--------------|
|           |           |                    | Mean         | SD    | % of total | Mean           | SD    | % of total |          |              |
| 1         | DSM(18:0) | 733.6              | 0.023        | 0.005 | 27.3%      | 0.036          | 0.021 | 37.1%      | 60.1%    |              |
| 2         | DSM(22:0) | 789.7              | 0.048        | 0.010 | 57.8%      | 0.046          | 0.013 | 46.8%      | -4.3%    |              |
| 3         | DSM(24:0) | 817.7              | 0.012        | 0.002 | 14.9%      | 0.016          | 0.007 | 16.1%      | 27.8%    |              |
| Total DSM |           |                    | 0.08         |       |            | 0.10           |       |            | 27.9%    |              |

N. Sulfatide (SU)

| N        | Name           | [M-H] <sup>-</sup> | r-sham (n=5) |    |            | r-mTBI (n = 5) |    |            | % change | sign. change |
|----------|----------------|--------------------|--------------|----|------------|----------------|----|------------|----------|--------------|
|          |                |                    | Mean         | SD | % of total | Mean           | SD | % of total |          |              |
| 1        | SU(d18:1-18:0) | 806                |              |    |            |                |    |            | -15.0%   |              |
| 2        | SU(d18:1-22:0) | 862                |              |    |            |                |    |            | -19.3%   |              |
| 3        | SU(d18:1-22:0) | 878                |              |    |            |                |    |            | -15.5%   |              |
| 4        | SU(d18:1-24:1) | 888                |              |    |            |                |    |            | -9.6%    |              |
| 5        | SU(d18:1-24:0) | 890                |              |    |            |                |    |            | -16.9%   |              |
| 6        | SU(d18:1-24:1) | 904                |              |    |            |                |    |            | -5.0%    |              |
| 7        | SU(d18:1-24:0) | 906                |              |    |            |                |    |            | -11.7%   |              |
| Total SU |                |                    |              |    |            |                |    |            | -13.3%   |              |
